# Supplementary material for: Pre-dominance of dengue non-cross-reacting SARS-CoV-2 spike antibodies during the Omicron era and their role in the ADE-mediated surge of Dengue virus serotype 3
Source: bioRxiv or medRxiv preprint supplement (doi:10.1101/2023.09.08.23295136), 2023-09-10
Supplement: Supplementary file [file media-1.pdf]

**Table S1:** List of prevalent dengue virus serotypes in the pre- and post-COVID-19 era.

| Sl. No. | Location                           | Most prevalent serotype in respective years |                  |                           |                      |                 |        |
|---------|------------------------------------|---------------------------------------------|------------------|---------------------------|----------------------|-----------------|--------|
|         |                                    | 2018                                        | 2019             | 2020                      | 2021                 | 2022            | 2023   |
| 1.      | Eastern India (Kolkata)            | DV-2 (87.14 %)¹                             | DV-2 (70.54 %)²  | Low DV cases³             | DV-3 (48.3 %)⁴       | DV-3 (46-52 %)⁵ | NA     |
| 2.      | South India (Tamil Nadu, Kerala)   | DV-2⁶                                       | NA               | NA                        | NA                   | DV-3⁷           | DV-3⁷  |
| 3.      | Bangladesh                         | DV-2 (40.95 %)⁸                             | DV-3 (91.86%)⁸   | Low DV cases⁹             | DV-3 (87.5-100%)⁸,¹⁰ | DV-3 (89%)⁸,¹¹  | NA     |
| 4.      | Sri Lanka                          | DV-2 (56%)¹²                                | DV-3 (47.62 %)¹³ | Low DV-2 <sup>13,14</sup> | DV-3¹³               | NA              | NA     |
| 5.      | Brazil                             | DV-2¹⁵                                      | DV-1¹⁵           | DV-2¹⁵                    | DV-1¹⁵               | DV-1¹⁵          | DV-3¹⁶ |
| 6.      | Singapore                          | DV-2¹⁷                                      | DV-2¹⁷           | DV-3¹⁸                    | DV-3¹⁷               | DV-3¹⁷          | DV-3¹⁷ |
| 7.      | Indonesia (Manado, North Sulawesi) | NA                                          | DV-3¹⁹           | Low DV²⁰                  | NA                   | DV-3²¹          | NA     |
| 8.      | China-Guangzhou                    | DV-1 (85%)²²                                | NA               | Low DV-2²³                | NA                   | NA              | NA     |
| 9.      | Niger-Africa                       | NA                                          | NA               | NA                        | NA                   | DV-3²⁴          | NA     |

\*NA: No relevant data available

**Table S2:** Patient information on COVID-19 serum samples collected during January, 2022

| <b>Sl. No.</b> | <b>Isolate name</b> | <b>Age range</b> | <b>Sex</b> | <b>Hospital ward</b> | <b>Approximate date of admission of the patient to the Hospital</b> | <b>Sample procurement date (8-9 days later)</b> |
|----------------|---------------------|------------------|------------|----------------------|---------------------------------------------------------------------|-------------------------------------------------|
| 1              | Patient-1A          | 51-55            | F          | Standard ward        | January, 2022                                                       | January, 2022                                   |
| 2              | Patient-1B          | 51-55            | F          | Standard ward        | January, 2022                                                       | January, 2022                                   |
| 3              | Patient-1C          | 51-55            | M          | Standard ward        | January, 2022                                                       | January, 2022                                   |
| 4              | Patient-1D          | 51-55            | M          | Standard ward        | January, 2022                                                       | January, 2022                                   |
| 5              | Patient-1E          | 56-60            | F          | Standard ward        | January, 2022                                                       | January, 2022                                   |
| 6              | Parient-1F          | 51-55            | F          | Standard ward        | January, 2022                                                       | January, 2022                                   |
| 7              | Patient-1G          | 56-60            | F          | Standard ward        | January, 2022                                                       | January, 2022                                   |
| 8              | Patient-1H          | 71-75            | M          | Standard ward        | January, 2022                                                       | January, 2022                                   |
| 9              | Patient-1I          | 66-70            | M          | Standard ward        | January, 2022                                                       | January, 2022                                   |
| 10             | Patient-1J          | 76-80            | F          | Standard ward        | January, 2022                                                       | January, 2022                                   |
| 11             | Patient-1K          | 81-85            | F          | Standard ward        | January, 2022                                                       | January, 2022                                   |
| 12             | Patient-1L          | 81-85            | F          | Standard ward        | January, 2022                                                       | January, 2022                                   |
| 13             | Patient-1M          | 41-45            | F          | Standard ward        | January, 2022                                                       | January, 2022                                   |

**Table S3:** Patient information on COVID-19 serum samples collected during August, 2022

| <b>Sl. No.</b> | <b>Isolate name</b> | <b>Age range</b> | <b>Sex</b> | <b>Hospital ward</b> | <b>Approximate date of admission of the patient to the Hospital</b> | <b>Sample procurement date (3-8 days later)</b> |
|----------------|---------------------|------------------|------------|----------------------|---------------------------------------------------------------------|-------------------------------------------------|
| 1              | Patient-S01         | 61-65            | F          | Intensive Care Unit  | August, 2022                                                        | August, 2022                                    |
| 2              | Patient-S02         | 76-80            | M          | High Dependency Unit | August, 2022                                                        | August, 2022                                    |
| 3              | Patient-S03         | 66-70            | M          | Intensive Care Unit  | August, 2022                                                        | August, 2022                                    |
| 4              | Patient-S04         | 61-65            | M          | Standard ward        | August, 2022                                                        | August, 2022                                    |
| 5              | Patient-S05         | 21-25            | F          | Standard ward        | August, 2022                                                        | August, 2022                                    |
| 6              | Patient-S06         | 66-70            | M          | High Dependency Unit | August, 2022                                                        | August, 2022                                    |
| 7              | Patient-S07         | 76-80            | M          | High Dependency Unit | August, 2022                                                        | August, 2022                                    |
| 8              | Patient-S08         | 41-45            | M          | High Dependency Unit | August, 2022                                                        | August, 2022                                    |
| 9              | Patient-S09         | 46-50            | M          | Standard ward        | August, 2022                                                        | August, 2022                                    |
| 10             | Patient-S10         | 71-75            | M          | Intensive Care Unit  | August, 2022                                                        | August, 2022                                    |
| 11             | Patient-S11         | 66-70            | M          | High Dependency Unit | August, 2022                                                        | August, 2022                                    |
| 12             | Patient-S12         | 61-65            | F          | Standard ward        | August, 2022                                                        | August, 2022                                    |
| 13             | Patient-S13         | 81-85            | M          | Standard ward        | August, 2022                                                        | August, 2022                                    |
| 14             | Patient-S14         | 66-70            | M          | High Dependency Unit | August, 2022                                                        | August, 2022                                    |
| 15             | Patient-S15         | 86-90            | M          | Standard ward        | August, 2022                                                        | August, 2022                                    |
| 16             | Patient-S16         | 66-70            | M          | Standard ward        | August, 2022                                                        | August, 2022                                    |
| 17             | Patient-S17         | 71-75            | F          | Intensive Care Unit  | August, 2022                                                        | August, 2022                                    |
| 18             | Patient-S18         | 61-65            | M          | High Dependency Unit | August, 2022                                                        | August, 2022                                    |
| 19             | Patient-S19         | 56-60            | M          | High Dependency Unit | August, 2022                                                        | August, 2022                                    |
| 20             | Patient-S20         | 61-65            | F          | High Dependency Unit | August, 2022                                                        | August, 2022                                    |
| 21             | Patient-S21         | 51-55            | M          | Intensive Care Unit  | August, 2022                                                        | August, 2022                                    |
| 22             | Patient-S22         | 76-80            | F          | Standard ward        | August, 2022                                                        | August, 2022                                    |
| 23             | Patient-S23         | 46-50            | M          | Standard ward        | August, 2022                                                        | August, 2022                                    |
| 24             | Patient-S24         | 76-80            | M          | Intensive Care Unit  | August, 2022                                                        | August, 2022                                    |
| 25             | Patient-S25         | 86-90            | F          | Intensive Care Unit  | August, 2022                                                        | August, 2022                                    |
| 26             | Patient-S26         | 86-90            | M          | Standard ward        | August, 2022                                                        | August, 2022                                    |
| 27             | Patient-S27         | 61-65            | F          | High Dependency Unit | August, 2022                                                        | August, 2022                                    |
| 28             | Patient-S28         | 76-80            | M          | High Dependency Unit | August, 2022                                                        | August, 2022                                    |
| 29             | Patient-S29         | 61-65            | F          | Intensive Care Unit  | August, 2022                                                        | August, 2022                                    |
| 30             | Patient-S30         | 71-75            | F          | High Dependency Unit | August, 2022                                                        | August, 2022                                    |
| 31             | Patient-S31         | 76-80            | M          | Intensive Care Unit  | August, 2022                                                        | August, 2022                                    |
| 32             | Patient-S32         | 46-50            | F          | High Dependency Unit | August, 2022                                                        | August, 2022                                    |
| 33             | Patient-S33         | 71-75            | F          | Standard ward        | August, 2022                                                        | August, 2022                                    |

**Table S4:** Patient information on COVID-19 serum samples collected during September, 2022

| <b>Sl. No.</b> | <b>Isolate name</b> | <b>Age range</b> | <b>Sex</b> | <b>Hospital ward</b> | <b>Approximate date of admission of the patient to the Hospital</b> | <b>Sample procurement date (9-10 days later)</b> |
|----------------|---------------------|------------------|------------|----------------------|---------------------------------------------------------------------|--------------------------------------------------|
| 1              | Patient-P1          | 66-70            | F          | Standard ward        | September, 2022                                                     | September, 2022                                  |
| 2              | Patient-P2          | 76-80            | M          | Standard ward        | September, 2022                                                     | September, 2022                                  |
| 3              | Patient-P3          | 51-55            | F          | Standard ward        | September, 2022                                                     | September, 2022                                  |
| 4              | Patient-P4          | 71-75            | M          | Standard ward        | September, 2022                                                     | September, 2022                                  |
| 5              | Patient-P5          | 31-35            | M          | Standard ward        | September, 2022                                                     | September, 2022                                  |
| 6              | Patient-P6          | 21-25            | F          | Standard ward        | September, 2022                                                     | September, 2022                                  |
| 7              | Patient-P7          | 81-85            | F          | Standard ward        | September, 2022                                                     | September, 2022                                  |
| 8              | Patient-P8          | 41-45            | F          | Standard ward        | September, 2022                                                     | September, 2022                                  |
| 9              | Patient-P9          | 51-55            | M          | Standard ward        | September, 2022                                                     | September, 2022                                  |

**Table S5: Month-wise COVID-19 infection, from 2020-2023<sup>25</sup>**

| <b>Year</b> | <b>COVID-19 Infection</b> |
|-------------|---------------------------|
| Jan-20      | 0                         |
| Jan-20      | 2                         |
| Feb-20      | 5                         |
| Feb-20      | 0                         |
| Feb-20      | 0                         |
| Mar-20      | 32                        |
| Mar-20      | 68                        |
| Mar-20      | 253                       |
| Mar-20      | 2395                      |
| Apr-20      | 2587                      |
| Apr-20      | 7356                      |
| Apr-20      | 10,784                    |
| Apr-20      | 13484                     |
| May-20      | 23,959                    |
| May-20      | 27,987                    |
| May-20      | 40,941                    |
| May-20      | 56,275                    |
| Jun-20      | 64,484                    |
| Jun-20      | 74,294                    |
| Jun-20      | 89,539                    |
| Jun-20      | 1,18,398                  |
| Jul-20      | 1,76,388                  |
| Jul-20      | 2,28,065                  |
| Jul-20      | 3,07,904                  |
| Jul-20      | 3,65,201                  |
| Aug-20      | 4,02,287                  |
| Aug-20      | 4,36,672                  |
| Aug-20      | 4,55,258                  |
| Aug-20      | 4,97,793                  |
| Sep-20      | 6,40,545                  |
| Sep-20      | 6,46,263                  |
| Sep-20      | 5,91,913                  |
| Sep-20      | 5,16,841                  |
| Oct-20      | 5,04,433                  |
| Oct-20      | 4,40,745                  |
| Oct-20      | 3,70,260                  |
| Oct-20      | 3,19,271                  |
| Nov-20      | 3,23,672                  |
| Nov-20      | 3,06,825                  |

|        |           |
|--------|-----------|
| Nov-20 | 2,81,227  |
| Nov-20 | 2,97,113  |
| Dec-20 | 2,12,807  |
| Dec-20 | 1,74,194  |
| Dec-20 | 1,56,627  |
| Dec-20 | 1,36,155  |
| Jan-21 | 1,36,319  |
| Jan-21 | 1,07,701  |
| Jan-21 | 96,548    |
| Jan-21 | 91,650    |
| Feb-21 | 80,180    |
| Feb-21 | 78,577    |
| Feb-21 | 86,711    |
| Feb-21 | 1,05,080  |
| Mar-21 | 1,14,068  |
| Mar-21 | 1,48,249  |
| Mar-21 | 2,40,082  |
| Mar-21 | 3,72,494  |
| Mar-21 | 5,13,885  |
| Apr-21 | 8,73,296  |
| Apr-21 | 14,29,304 |
| Apr-21 | 21,72,063 |
| Apr-21 | 25,97,285 |
| May-21 | 27,38,957 |
| May-21 | 23,87,663 |
| May-21 | 18,46,055 |
| May-21 | 13,64,668 |
| Jun-21 | 6,30,650  |
| Jun-21 | 4,41,976  |
| Jun-21 | 3,51,218  |
| Jun-21 | 3,12,250  |
| Jul-21 | 2,91,789  |
| Jul-21 | 2,68,843  |
| Jul-21 | 2,65,836  |
| Jul-21 | 2,83,923  |
| Aug-21 | 2,78,631  |
| Aug-21 | 2,58,121  |
| Aug-21 | 2,31,658  |
| Aug-21 | 2,70,796  |
| Sep-21 | 2,48,248  |
| Sep-21 | 2,11,242  |

|        |           |
|--------|-----------|
| Sep-21 | 2,04,582  |
| Sep-21 | 1,61,158  |
| Oct-21 | 1,39,572  |
| Oct-21 | 1,14,244  |
| Oct-21 | 1,07,749  |
| Oct-21 | 97,832    |
| Nov-21 | 82,236    |
| Nov-21 | 81,771    |
| Nov-21 | 73,106    |
| Nov-21 | 67,110    |
| Dec-21 | 57,255    |
| Dec-21 | 49,765    |
| Dec-21 | 46,527    |
| Dec-21 | 1,02,330  |
| Jan-22 | 6,38,872  |
| Jan-22 | 15,94,160 |
| Jan-22 | 21,15,100 |
| Jan-22 | 18,55,258 |
| Feb-22 | 44,383    |
| Feb-22 | 1,91,052  |
| Feb-22 | 93,644    |
| Feb-22 | 46,836    |
| Mar-22 | 28,038    |
| Mar-22 | 16,850    |
| Mar-22 | 11,612    |
| Mar-22 | 8,672     |
| Apr-22 | 7,140     |
| Apr-22 | 6,826     |
| Apr-22 | 15,448    |
| Apr-22 | 21,643    |
| May-22 | 23,006    |
| May-22 | 19,405    |
| May-22 | 14,772    |
| May-22 | 16,672    |
| Jun-22 | 45,200    |
| Jun-22 | 74,675    |
| Jun-22 | 93,281    |
| Jun-22 | 1,12,456  |
| Jul-22 | 1,20,222  |
| Jul-22 | 1,27,948  |
| Jul-22 | 1,38,156  |

|        |          |
|--------|----------|
| Jul-22 | 1,31,056 |
| Aug-22 | 1,25,921 |
| Aug-22 | 1,07,732 |
| Aug-22 | 85,965   |
| Aug-22 | 68,703   |
| Sep-22 | 38,824   |
| Sep-22 | 38,829   |
| Sep-22 | 33,926   |
| Sep-22 | 26,373   |
| Oct-22 | 17,526   |
| Oct-22 | 16,815   |
| Oct-22 | 13,914   |
| Oct-22 | 9,524    |
| Nov-22 | 5,798    |
| Nov-22 | 2,638    |
| Nov-22 | 2,547    |
| Nov-22 | 1,830    |
| Dec-22 | 1,430    |
| Dec-22 | 1,130    |
| Dec-22 | 1,154    |
| Dec-22 | 1,543    |
| Jan-23 | 1,275    |
| Jan-23 | 1,116    |
| Jan-23 | 881      |
| Jan-23 | 758      |
| Feb-23 | 755      |
| Feb-23 | 799      |
| Feb-23 | 1,180    |
| Feb-23 | 1,803    |
| Mar-23 | 2,672    |
| Mar-23 | 4,928    |
| Mar-23 | 8,727    |
| Mar-23 | 18,458   |
| Apr-23 | 34,011   |
| Apr-23 | 61,499   |
| Apr-23 | 73,874   |
| Apr-23 | 53,400   |
| May-23 | 24,241   |
| May-23 | 11,044   |
| May-23 | 5,787    |
| May-23 | 3,283    |



|        |       |
|--------|-------|
| Jun-23 | 1,206 |
| Jun-23 | 692   |
| Jun-23 | 472   |
| Jun-23 | 145   |

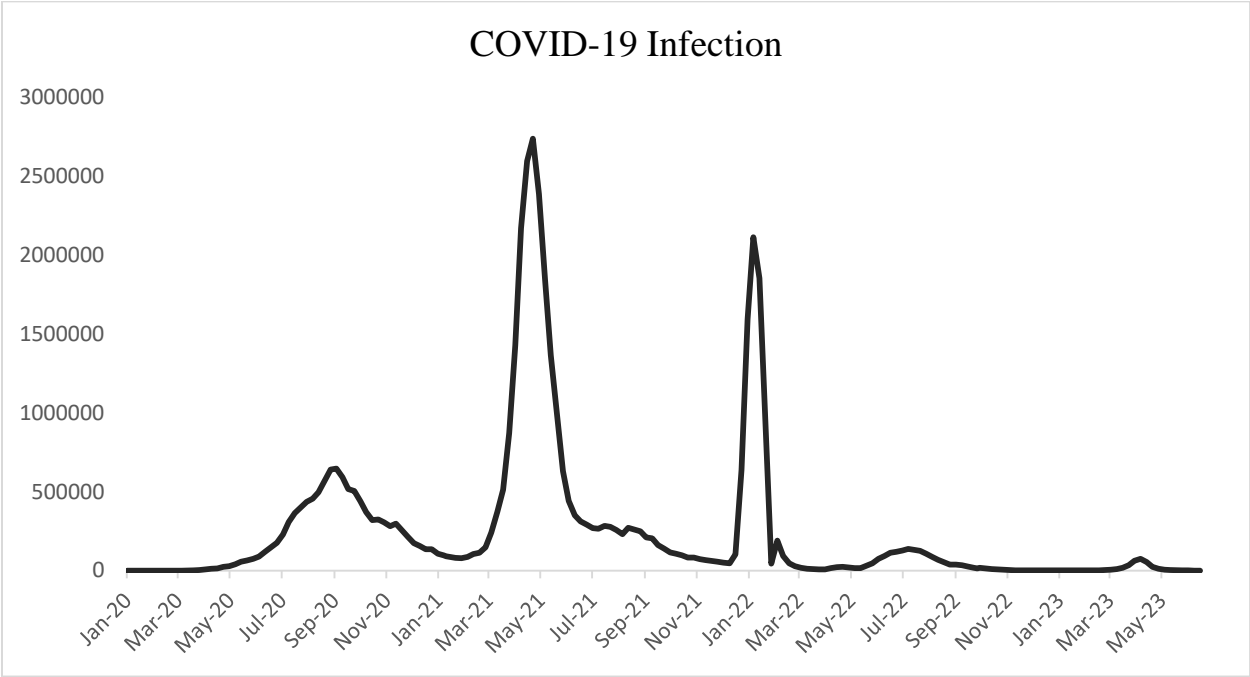

**Supplementary data**

**Table S1:** List of prevalent dengue virus serotypes in the pre and post-COVID-19 era.

**Table S2, S3 and S4:** Patient information of 55 COVID-19 samples

**Table S5:** Month-wise COVID-19 infection, from 2020-2023

## References

1. Mukherjee K, Sarkar R, Bhattacharjee D, Baske U, Manna A, Das O. Molecular characterization of dengue viruses during an outbreak in Kolkata: A hospital-based study. *Med J Dr DY Patil Vidyapeeth*. 2022;0(0):0. doi:10.4103/MJDRDYPU.MJDRDYPU\_119\_21
2. Verma P, Banerjee S, Baskey U, et al. Clinicopathological alteration of symptoms with serotype among dengue infected pediatric patients. *J Med Virol*. 2022;94(9):4348-4358. doi:10.1002/jmv.27862
3. Coronavirus in West Bengal | Amid Coronavirus, number dengue cases are much less in West Bengal this year - Anandabazar. Accessed July 16, 2023. <https://www.anandabazar.com/west-bengal/amid-coronavirus-number-dengue-cases-are-much-less-in-west-bengal-this-year-1.1196508>
4. State TOT on Dengue & Malaria case management. PH & CD Branch, Directorate of Health Services, May 2022. Accessed July 16, 2023. [https://www.wbhealth.gov.in/uploaded\\_files/IDSP/1.pdf](https://www.wbhealth.gov.in/uploaded_files/IDSP/1.pdf)
5. Kolkata logs 40 dengue cases in 3 weeks; Bypass, Tollygunge, Behala under watch | Kolkata News - Times of India. Accessed July 15, 2023. [https://timesofindia.indiatimes.com/city/kolkata/kol-logs-40-dengue-cases-in-3-wks-bypass-tolly-behala-under-watch/articleshow/101377309.cms?from=mdr&utm\\_source=contentofinterest&utm\\_medium=text&utm\\_campaign=cppst](https://timesofindia.indiatimes.com/city/kolkata/kol-logs-40-dengue-cases-in-3-wks-bypass-tolly-behala-under-watch/articleshow/101377309.cms?from=mdr&utm_source=contentofinterest&utm_medium=text&utm_campaign=cppst)
6. Alagarasu K, Patil JA, Kakade MB, et al. Serotype and genotype diversity of dengue viruses circulating in India: a multi-centre retrospective study involving the Virus Research Diagnostic Laboratory Network in 2018. *Int J Infect Dis*. 2021;111:242-252. doi:10.1016/j.IJID.2021.08.045
7. Denv-3 Suspected As Dominant Serotype | Kochi News - Times of India. Accessed July 15, 2023. [https://timesofindia.indiatimes.com/city/kochi/denv-3-suspected-as-dominant-serotype/articleshow/101231212.cms?from=mdr&utm\\_source=contentofinterest&utm\\_medium=text&utm\\_campaign=cppst](https://timesofindia.indiatimes.com/city/kochi/denv-3-suspected-as-dominant-serotype/articleshow/101231212.cms?from=mdr&utm_source=contentofinterest&utm_medium=text&utm_campaign=cppst)
8. Rahim R, Hasan A, Phadungsombat J, et al. Genetic Analysis of Dengue Virus in Severe and Non-Severe Cases in Dhaka, Bangladesh, in 2018–2022. *Viruses*. 2023;15(5). doi:10.3390/v15051144
9. Bhowmik KK, Ferdous J, Baral PK, Islam MS. Recent outbreak of dengue in Bangladesh: A threat to public health. *Heal Sci Reports*. 2023;6(4). doi:10.1002/hsr2.1210
10. Sarkar MMH, Rahman MS, Islam MR, et al. Comparative phylogenetic analysis and transcriptomic profiling of Dengue (DENV-3 genotype I) outbreak in 2021 in Bangladesh. *Virology*. 2023;20(1). doi:10.1186/s12985-023-02030-1
11. Haider N, Hasan MN, Khalil I, et al. The 2022 dengue outbreak in Bangladesh: hypotheses for the late resurgence of cases and fatalities. *J Med Entomol*. Published online 2023. doi:10.1093/jme/tjad057
12. Jayadas TTP, Kumanan T, Gomes L, et al. Regional variation in dengue virus serotypes in Sri Lanka and its clinical and epidemiological relevance. *Diagnostics*. 2021;11(11). doi:10.3390/DIAGNOSTICS11112084/S1

13. Abeynayake J. Distribution of Dengue Virus Serotypes during the COVID 19 Pandemic in Sri Lanka. *Viol Immunol J.* 2022;6(3):1-6. doi:10.23880/vij-16000299
14. Liyanage P, Rocklöv J, Tissera HA. The impact of covid–19 lockdown on dengue transmission in sri lanka; a natural experiment for understanding the influence of human mobility. *PLoS Negl Trop Dis.* 2021;15(6). doi:10.1371/journal.pntd.0009420
15. de Souza CS, Romano CM. Dengue in the cooling off period of the COVID-19 epidemic in Brazil: from the shadows to the spotlight. *Rev Inst Med Trop Sao Paulo.* 2022;64. doi:10.1590/S1678-9946202264044
16. Naveca FG, Santiago GA, Maito RM, et al. Reemergence of Dengue Virus Serotype 3, Brazil, 2023. *Emerg Infect Dis.* 2023;29(7):1482-1484. doi:10.3201/eid2907.230595
17. NEA. NEA | Quarterly Dengue Surveillance Data. NEA Quarterly Dengue Surveillance Data. Published 2019. Accessed July 16, 2023. <https://www.nea.gov.sg/dengue-zika/dengue/quarterly-dengue-surveillance-data>
18. Cheema HA, Mujtaba RS, Siddiqui A, et al. Singapore’s Dengue Outbreak Amidst the COVID-19 Pandemic: Challenges, Responses, and Lessons. *Infect Drug Resist.* 2023;16:1081-1085. doi:10.2147/IDR.S397407
19. Tatura SNN, Denis D, Santoso MS, et al. Outbreak of severe dengue associated with DENV-3 in the city of Manado, North Sulawesi, Indonesia. *Int J Infect Dis.* 2021;106:185-196. doi:10.1016/J.IJID.2021.03.065
20. Sasmono RT, Santoso MS. Movement dynamics: reduced dengue cases during the COVID-19 pandemic. *Lancet Infect Dis.* 2022;22(5):570-571. doi:10.1016/S1473-3099(22)00062-7
21. Dharma S, Hreeloita, S, Resinta. Indonesia records 94,355 dengue fever cases. Published 2022. Accessed July 16, 2023. <https://en.antaranews.com/news/255353/indonesia-records-94355-dengue-fever->
22. Liao F, Chen H, Xie J, et al. Molecular epidemiological characteristics of dengue virus carried by 34 patients in Guangzhou in 2018. *PLoS One.* 2019;14(11). doi:10.1371/JOURNAL.PONE.0224676
23. Jiang L, Liu Y, Su W, Liu W, Yang Z. Decreased dengue cases attributable to the effect of covid-19 in guangzhou in 2020. *PLoS Negl Trop Dis.* 2021;15(5):e0009441. doi:10.1371/journal.pntd.0009441
24. Lagare A, Faye M, Fintan G, et al. First introduction of dengue virus type 3 in Niger, 2022. *IJID Reg.* 2023;7:230-232. doi:10.1016/j.ijregi.2023.04.001
25. WHO Coronavirus (COVID-19) Dashboard | WHO Coronavirus (COVID-19) Dashboard With Vaccination Data. Accessed July 15, 2023. <https://covid19.who.int/table>
